# Supplementary material for: Phenolic Response to Walnut Anthracnose (Ophiognomonia leptostyla) Infection in Different Parts of Juglans regia Husks, Using HPLC-MS/MS
Source: MDPI journal article supplement (doi:10.3390/agriculture11070659), 2021-07-13
Supplement: s1 [file s1]

**Table S1.** Comparison of individual phenolic compounds in the husk of *Juglans regia* L. among three differently susceptible cultivars to walnut anthracnose (mean  $\pm$  SE, in mg/g dry weight)

| Phenolics                                   | 'Franquette'       |                    |                     |                    |
|---------------------------------------------|--------------------|--------------------|---------------------|--------------------|
|                                             | spot               | around infected    | around healthy      | healthy            |
| neochlorogenic acid (3-caffeoylquinic acid) | 0.52 $\pm$ 0.02 b  | 0.61 $\pm$ 0.02 b  | 0.56 $\pm$ 0.02 b   | 0.31 $\pm$ 0.04 a  |
| procyanidin dimer 1                         | 1.91 $\pm$ 0.07 a  | 2.73 $\pm$ 0.10 b  | 2.48 $\pm$ 0.06 b   | 2.08 $\pm$ 0.04 a  |
| procyanidin dimer 2                         | 5.98 $\pm$ 0.15 c  | 5.63 $\pm$ 0.03 c  | 4.17 $\pm$ 0.03 b   | 1.80 $\pm$ 0.05 a  |
| 3- <i>p</i> -coumaoylquinic acid            | 0.48 $\pm$ 0.01 c  | 0.48 $\pm$ 0.04 c  | 0.34 $\pm$ 0.02 b   | 0.18 $\pm$ 0.01 a  |
| (+)-catechin                                | 6.60 $\pm$ 0.27 c  | 4.94 $\pm$ 0.07 b  | 4.86 $\pm$ 0.09 b   | 3.89 $\pm$ 0.05 a  |
| dihydroxytetralone hexoside                 | 12.92 $\pm$ 0.15 c | 12.54 $\pm$ 0.63 b | 8.40 $\pm$ 0.06 b   | 4.21 $\pm$ 0.09 a  |
| (-)-epicatechin                             | 0.70 $\pm$ 0.16 a  | 1.19 $\pm$ 0.19 ab | 1.57 $\pm$ 0.16 b   | 0.89 $\pm$ 0.05 a  |
| procyanidin dimer 3                         | 2.59 $\pm$ 0.10 b  | 1.99 $\pm$ 0.08 a  | 2.89 $\pm$ 0.18 b   | 2.68 $\pm$ 0.13 b  |
| hydrojuglone $\beta$ -D-glucopyranoside     | 5.40 $\pm$ 0.22 b  | 3.93 $\pm$ 0.17 a  | 8.16 $\pm$ 0.20 c   | 10.34 $\pm$ 0.26 d |
| procyanidin dimer 4                         | 1.58 $\pm$ 0.05 c  | 1.39 $\pm$ 0.11 bc | 1.12 $\pm$ 0.11 b   | 0.39 $\pm$ 0.08 a  |
| hydrojuglone derivative pentoside 1         | 1.62 $\pm$ 0.04 b  | 1.70 $\pm$ 0.20 b  | 1.58 $\pm$ 0.13 b   | 0.89 $\pm$ 0.09 a  |
| hydrojuglone derivative pentoside 2         | 1.82 $\pm$ 0.09 a  | 2.01 $\pm$ 0.22 a  | 2.49 $\pm$ 0.27 a   | 2.28 $\pm$ 0.39 a  |
| dihydroxytetralone galloyl hexoside         | 3.74 $\pm$ 0.12 a  | 4.03 $\pm$ 0.22 a  | 5.73 $\pm$ 0.21 b   | 6.34 $\pm$ 0.22 b  |
| (epi)-catechin derivative                   | 1.87 $\pm$ 0.06 b  | 1.87 $\pm$ 0.08 b  | 1.99 $\pm$ 0.07 b   | 0.88 $\pm$ 0.08 a  |
| quercetin-3-galactoside                     | 0.40 $\pm$ 0.02 a  | 0.69 $\pm$ 0.04 b  | 1.58 $\pm$ 0.04 c   | 0.69 $\pm$ 0.10 b  |
| trihydroxytetralone galloyl hexoside        | 0.91 $\pm$ 0.09 a  | 1.39 $\pm$ 0.11 b  | 3.51 $\pm$ 0.11 c   | 1.12 $\pm$ 0.08 ab |
| hydrojuglone derivative pentoside 3         | 13.22 $\pm$ 0.37 d | 11.74 $\pm$ 0.26 c | 8.82 $\pm$ 0.19 b   | 4.47 $\pm$ 0.13 a  |
| quercetin-3-xyloside                        | 0.03 $\pm$ 0.00 a  | 0.07 $\pm$ 0.01 b  | 0.16 $\pm$ 0.00 c   | 0.05 $\pm$ 0.00 b  |
| quercetin-3-arabinopyranoside               | 0.03 $\pm$ 0.00 a  | 0.13 $\pm$ 0.01 b  | 0.45 $\pm$ 0.01 c   | 0.13 $\pm$ 0.01 b  |
| gallic acid derivative                      | 0.45 $\pm$ 0.03 a  | 0.51 $\pm$ 0.02 a  | 0.85 $\pm$ 0.03 b   | 0.86 $\pm$ 0.03 b  |
| quercetin-3-arabinofuranoside               | 0.45 $\pm$ 0.00 a  | 0.17 $\pm$ 0.01 b  | 0.35 $\pm$ 0.02 c   | 0.18 $\pm$ 0.01 b  |
| quercetin-3-rhamnoside                      | 0.07 $\pm$ 0.00 a  | 0.17 $\pm$ 0.00 b  | 0.36 $\pm$ 0.01 c   | 0.18 $\pm$ 0.01 b  |
| 1,4-naphthoquinone                          | 0.25 $\pm$ 0.01 a  | 0.27 $\pm$ 0.01 a  | 0.54 $\pm$ 0.04 c   | 0.39 $\pm$ 0.02 b  |
| hydrojuglone                                | 0.08 $\pm$ 0.00 a  | 0.10 $\pm$ 0.01 a  | 0.19 $\pm$ 0.01 b   | 0.16 $\pm$ 0.01 b  |
| juglone (5-hydroxy-1,4-naphthoquinone)      | 6.12 $\pm$ 0.23 ab | 5.45 $\pm$ 0.22 a  | 7.16 $\pm$ 0.33 b   | 5.19 $\pm$ 0.27 a  |
| juglanin B                                  | 2.57 $\pm$ 0.12 c  | 1.10 $\pm$ 0.04 b  | 0.78 $\pm$ 0.07 ab  | 0.69 $\pm$ 0.09 a  |
| Total naphthoquinones                       | 48.65 $\pm$ 1.00 c | 44.26 $\pm$ 0.71 b | 47.36 $\pm$ 1.68 bc | 36.08 $\pm$ 1.64 a |
| Total flavanols                             | 21.23 $\pm$ 0.23 c | 19.74 $\pm$ 0.30 b | 19.07 $\pm$ 0.19 b  | 12.61 $\pm$ 0.36 a |
| Total flavonols                             | 0.57 $\pm$ 0.00 a  | 1.23 $\pm$ 0.07 b  | 2.91 $\pm$ 0.08 c   | 1.22 $\pm$ 0.14 b  |
| Total analyzed phenolic compounds           | 71.91 $\pm$ 0.51 c | 66.84 $\pm$ 0.80 b | 71.09 $\pm$ 0.91 bc | 51.26 $\pm$ 1.43 a |

  

|                                             | 'M10'              |                    |                    |                    |
|---------------------------------------------|--------------------|--------------------|--------------------|--------------------|
|                                             | spot               | around infected    | around healthy     | healthy            |
| neochlorogenic acid (3-caffeoylquinic acid) | 1.32 $\pm$ 0.01 b  | 1.65 $\pm$ 0.08 c  | 1.25 $\pm$ 0.02 b  | 1.01 $\pm$ 0.01 a  |
| procyanidin dimer 1                         | 3.57 $\pm$ 0.08 a  | 5.92 $\pm$ 0.24 c  | 5.06 $\pm$ 0.05 b  | 4.82 $\pm$ 0.15 b  |
| procyanidin dimer 2                         | 13.75 $\pm$ 0.19 b | 14.24 $\pm$ 0.97 b | 5.48 $\pm$ 0.25 a  | 4.86 $\pm$ 0.10 a  |
| 3- <i>p</i> -coumaoylquinic acid            | 0.89 $\pm$ 0.01 c  | 0.92 $\pm$ 0.05 c  | 0.57 $\pm$ 0.01 b  | 0.44 $\pm$ 0.02 a  |
| (+)-catechin                                | 8.95 $\pm$ 0.16 a  | 17.63 $\pm$ 0.92 c | 13.05 $\pm$ 0.16 b | 12.17 $\pm$ 0.27 b |
| dihydroxytetralone hexoside                 | 23.61 $\pm$ 0.23 b | 25.24 $\pm$ 1.43 b | 10.39 $\pm$ 0.32 a | 7.39 $\pm$ 0.32 a  |
| (-)-epicatechin                             | 1.30 $\pm$ 0.09 a  | 2.25 $\pm$ 0.16 b  | 1.18 $\pm$ 0.08 a  | 1.09 $\pm$ 0.10 a  |
| procyanidin dimer 3                         | 5.54 $\pm$ 0.09 b  | 7.45 $\pm$ 0.22 c  | 2.48 $\pm$ 0.24 a  | 2.96 $\pm$ 0.31 a  |
| hydrojuglone $\beta$ -D-glucopyranoside     | 9.43 $\pm$ 0.14 b  | 12.88 $\pm$ 1.06 c | 4.62 $\pm$ 0.16 a  | 8.62 $\pm$ 0.41 b  |

|                                        |                 |                 |                 |                |
|----------------------------------------|-----------------|-----------------|-----------------|----------------|
| procyanidin dimer 4                    | 3.76 ± 0.05 c   | 4.02 ± 0.27 c   | 1.49 ± 0.10 b   | 0.69 ± 0.13 a  |
| hydrojuglone derivative pentoside 1    | 4.05 ± 0.13 c   | 4.53 ± 0.29 c   | 2.47 ± 0.12 b   | 1.53 ± 0.13 a  |
| hydrojuglone derivative pentoside 2    | 4.35 ± 0.09 c   | 5.32 ± 0.31 d   | 3.19 ± 0.13 b   | 2.27 ± 0.20 a  |
| dihydroxytetralone galloyl hexoside    | 6.18 ± 0.16 ab  | 8.64 ± 0.55 c   | 6.53 ± 0.07 b   | 5.01 ± 0.18 a  |
| (epi)catechin derivative               | 3.65 ± 0.16 c   | 4.10 ± 0.33 c   | 2.72 ± 0.07 b   | 1.45 ± 0.16 a  |
| quercetin-3-galactoside                | 0.74 ± 0.01 a   | 1.33 ± 0.07 c   | 0.99 ± 0.01 b   | 0.86 ± 0.05 ab |
| trihydroxytetralone galloyl hexoside   | 2.12 ± 0.02 ab  | 2.63 ± 0.16 b   | 2.02 ± 0.14 a   | 1.63 ± 0.10 a  |
| hydrojuglone derivative pentoside 3    | 23.59 ± 0.51 b  | 30.75 ± 1.95 c  | 18.87 ± 0.11 b  | 11.13 ± 0.59 a |
| quercetin-3-xyloside                   | 0.05 ± 0.00 a   | 0.10 ± 0.01 a   | 0.74 ± 0.06 b   | 0.08 ± 0.01 a  |
| quercetin-3-arabinopyranoside          | 0.06 ± 0.00 a   | 0.19 ± 0.01 a   | 1.76 ± 0.12 b   | 0.21 ± 0.01 a  |
| gallic acid derivative                 | 0.39 ± 0.01 c   | 0.44 ± 0.02 c   | 0.29 ± 0.01 b   | 0.21 ± 0.02 a  |
| quercetin-3-arabinofuranoside          | 0.09 ± 0.00 a   | 0.28 ± 0.03 a   | 1.81 ± 0.10 b   | 0.33 ± 0.02 a  |
| quercetin-3-rhamnoside                 | 0.13 ± 0.00 a   | 0.33 ± 0.03 a   | 2.13 ± 0.12 b   | 0.34 ± 0.02 a  |
| 1,4-naphthoquinone                     | 1.91 ± 0.16 b   | 2.87 ± 0.10 c   | 2.41 ± 0.08 bc  | 0.72 ± 0.11 a  |
| hydrojuglone                           | 0.61 ± 0.05 b   | 0.95 ± 0.03 c   | 0.71 ± 0.02 b   | 0.29 ± 0.04 a  |
| juglone (5-hydroxy-1,4-naphthoquinone) | 13.14 ± 0.53 ab | 17.68 ± 0.67 c  | 15.30 ± 0.32 b  | 13.03 ± 0.33 a |
| juglanin B                             | 2.51 ± 0.12 b   | 1.73 ± 0.16 a   | 1.65 ± 0.01 a   | 1.41 ± 0.05 a  |
| Total naphthoquinones                  | 91.49 ± 1.90 b  | 113.21 ± 6.47 c | 68.16 ± 1.43 a  | 53.03 ± 2.23 a |
| Total flavanols                        | 40.51 ± 0.48 b  | 55.62 ± 3.01 c  | 31.46 ± 0.94 a  | 28.05 ± 1.20 a |
| Total flavonols                        | 1.07 ± 0.01 a   | 2.23 ± 0.14 b   | 7.43 ± 0.37 c   | 1.82 ± 0.09 ab |
| Total analyzed phenolic compounds      | 135.68 ± 2.41 c | 174.07 ± 9.71 d | 109.16 ± 2.16 b | 84.6 ± 3.54 a  |

**'M10-37'**

|                                             | spot           | around infected | around healthy | healthy        |
|---------------------------------------------|----------------|-----------------|----------------|----------------|
| neochlorogenic acid (3-caffeoylquinic acid) | 1.63 ± 0.09 b  | 2.03 ± 0.07 c   | 1.69 ± 0.06 b  | 0.79 ± 0.01 a  |
| procyanidin dimer 1                         | 2.60 ± 0.18 a  | 3.55 ± 0.03 c   | 3.28 ± 0.08 bc | 2.83 ± 0.04 ab |
| procyanidin dimer 2                         | 17.47 ± 0.63 d | 15.28 ± 0.50 c  | 10.25 ± 0.52 b | 4.48 ± 0.07 a  |
| 3- <i>p</i> -coumaoylquinic acid            | 1.01 ± 0.05 c  | 1.01 ± 0.06 c   | 0.63 ± 0.03 b  | 0.33 ± 0.00 a  |
| (+)-catechin                                | 10.38 ± 0.79 b | 15.65 ± 0.25 c  | 14.37 ± 0.47 c | 7.94 ± 0.10 a  |
| dihydroxytetralone hexoside                 | 28.24 ± 1.40 d | 24.61 ± 0.38 c  | 14.81 ± 0.12 b | 7.90 ± 0.27 a  |
| (-)-epicatechin                             | 0.78 ± 0.04 a  | 1.26 ± 0.11 b   | 1.63 ± 0.03 c  | 0.97 ± 0.04 ab |
| procyanidin dimer 3                         | 8.93 ± 1.04 c  | 9.56 ± 0.30 c   | 6.38 ± 0.25 b  | 3.31 ± 0.11 a  |
| hydrojuglone β-D-glucopyranoside            | 21.94 ± 1.41 b | 28.03 ± 0.45 c  | 19.03 ± 0.48 b | 9.45 ± 0.20 a  |
| procyanidin dimer 4                         | 3.33 ± 0.20 bc | 3.56 ± 0.22 c   | 2.58 ± 0.26 b  | 0.76 ± 0.06 a  |
| hydrojuglone derivative pentoside 1         | 3.57 ± 0.33 b  | 4.62 ± 0.26 b   | 3.89 ± 0.25 b  | 1.57 ± 0.04 a  |
| hydrojuglone derivative pentoside 2         | 3.15 ± 0.42 b  | 3.96 ± 0.19 b   | 5.80 ± 0.09 b  | 1.78 ± 0.08 a  |
| dihydroxytetralone galloyl hexoside         | 5.95 ± 0.54 ab | 8.57 ± 0.30 c   | 7.81 ± 0.57 bc | 4.56 ± 0.02 a  |
| (epi)catechin derivative                    | 2.82 ± 0.18 b  | 3.54 ± 0.17 c   | 2.91 ± 0.10 b  | 1.12 ± 0.03 a  |
| quercetin-3-galactoside                     | 0.75 ± 0.06 a  | 1.15 ± 0.04 b   | 1.32 ± 0.04 b  | 0.91 ± 0.01 a  |
| trihydroxytetralone galloyl hexoside        | 1.46 ± 0.08 a  | 2.43 ± 0.10 b   | 2.74 ± 0.08 b  | 1.68 ± 0.05 a  |
| hydrojuglone derivative pentoside 3         | 20.69 ± 1.43 b | 31.09 ± 0.60 d  | 24.73 ± 0.57 c | 9.77 ± 0.16 a  |
| quercetin-3-xyloside                        | 0.05 ± 0.00 a  | 0.05 ± 0.00 a   | 0.08 ± 0.00 b  | 0.08 ± 0.00 b  |
| quercetin-3-arabinopyranoside               | 0.03 ± 0.00 a  | 0.04 ± 0.01 a   | 0.16 ± 0.01 b  | 0.17 ± 0.01 b  |
| gallic acid derivative                      | 0.68 ± 0.05 ab | 1.01 ± 0.02 c   | 0.91 ± 0.10 bc | 0.59 ± 0.02 a  |
| quercetin-3-arabinofuranoside               | 0.07 ± 0.01 a  | 0.09 ± 0.00 a   | 0.22 ± 0.01 b  | 0.21 ± 0.01 b  |
| quercetin-3-rhamnoside                      | 0.13 ± 0.01 a  | 0.16 ± 0.01 a   | 0.28 ± 0.01 b  | 0.26 ± 0.01 b  |
| 1,4-naphthoquinone                          | 1.52 ± 0.40 a  | 3.80 ± 0.13 b   | 1.67 ± 0.19 a  | 1.59 ± 0.07 a  |

|                                        |                 |                 |                 |                |
|----------------------------------------|-----------------|-----------------|-----------------|----------------|
| hydrojuglone                           | 0.49 ± 0.15 a   | 1.23 ± 0.04 b   | 0.54 ± 0.03 a   | 0.60 ± 0.05 a  |
| juglone (5-hydroxy-1,4-naphthoquinone) | 10.36 ± 0.68 a  | 12.89 ± 0.28 b  | 13.78 ± 0.76 b  | 9.36 ± 0.22 a  |
| juglanin B                             | 3.35 ± 0.15 c   | 2.18 ± 0.09 b   | 1.77 ± 0.16 b   | 1.15 ± 0.07 a  |
| Total naphthoquinones                  | 100.74 ± 6.47 b | 123.42 ± 2.28 c | 94.57 ± 3.02 b  | 49.42 ± 0.62 a |
| Total flavanols                        | 46.32 ± 2.95 bc | 52.41 ± 1.43 c  | 41.42 ± 1.60 b  | 21.42 ± 0.37 a |
| Total flavonols                        | 1.03 ± 0.09 a   | 1.49 ± 0.05 b   | 2.05 ± 0.03 c   | 1.63 ± 0.04 b  |
| Total analyzed phenolic compounds      | 151.40 ± 9.65 b | 181.37 ± 3.76 c | 141.26 ± 4.77 b | 74.19 ± 1.01 a |

---

Data are means ± standard error

Means followed by different letters across the variety (within columns) are significantly different (p <0.05).

Spot: inner spot of infected tissue, around infected: outer margin of infected tissue, around healthy: healthy tissue surrounding the infection, healthy: healthy tissue
